# Supplementary material
Source: MDPI journal article supplement (https://www.mdpi.com/2076-3417/9/9/1947)
Supplement: s1 [file s1]

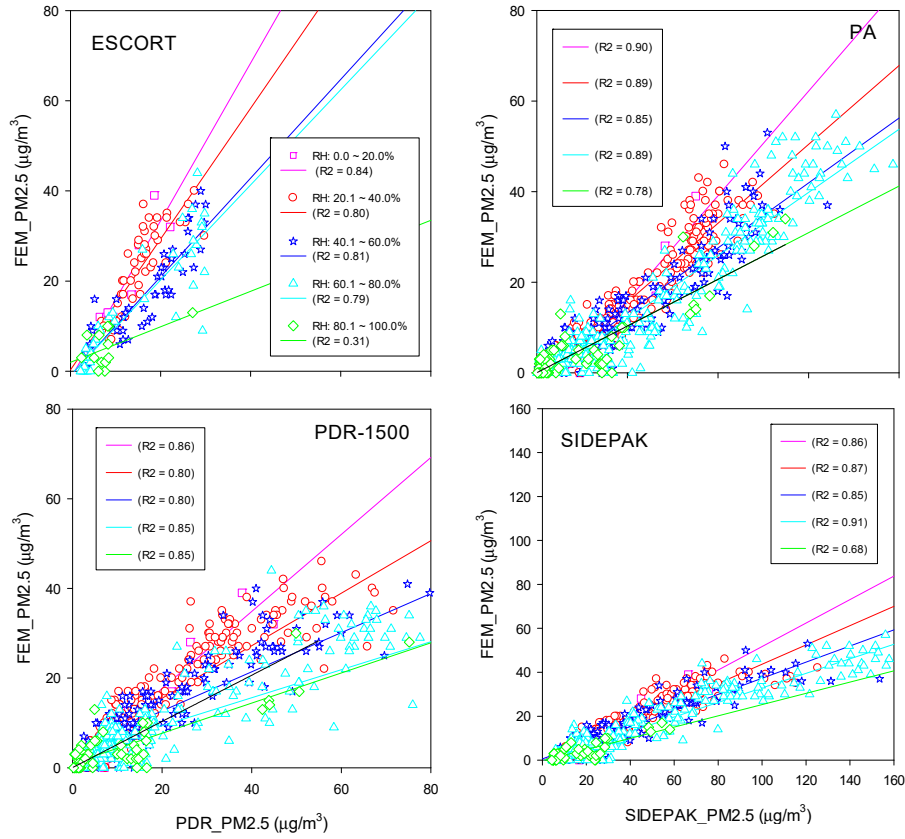

Figure S1. Scatter plots of PM<sub>2.5</sub> concentrations of IRMs with those of FEM, i.e., BAM, by the level of relative humidity. The data points refer to each paired hourly mean value (n=240, except ESCORT which had 120 points due to malfunction of a device with records of high internal temperature values during our outdoor test).
